# Supplementary material for: Multi-breed genome-wide association studies across countries for electronically recorded behavior traits in local dual-purpose cows
Source: PubMed Central journal article supplement (PMC6821105; doi:10.1371/journal.pone.0221973), 2019-10-30

MEAN

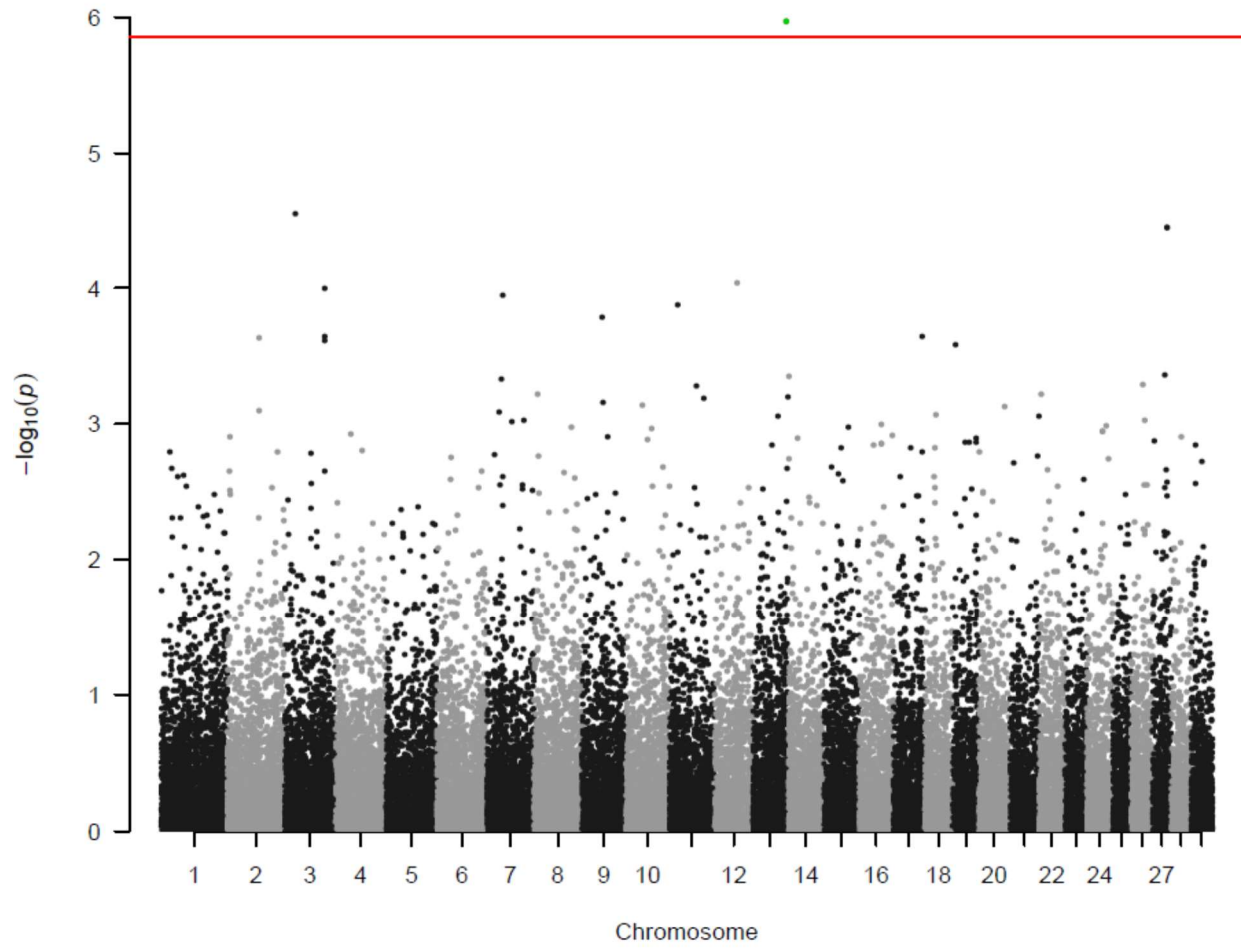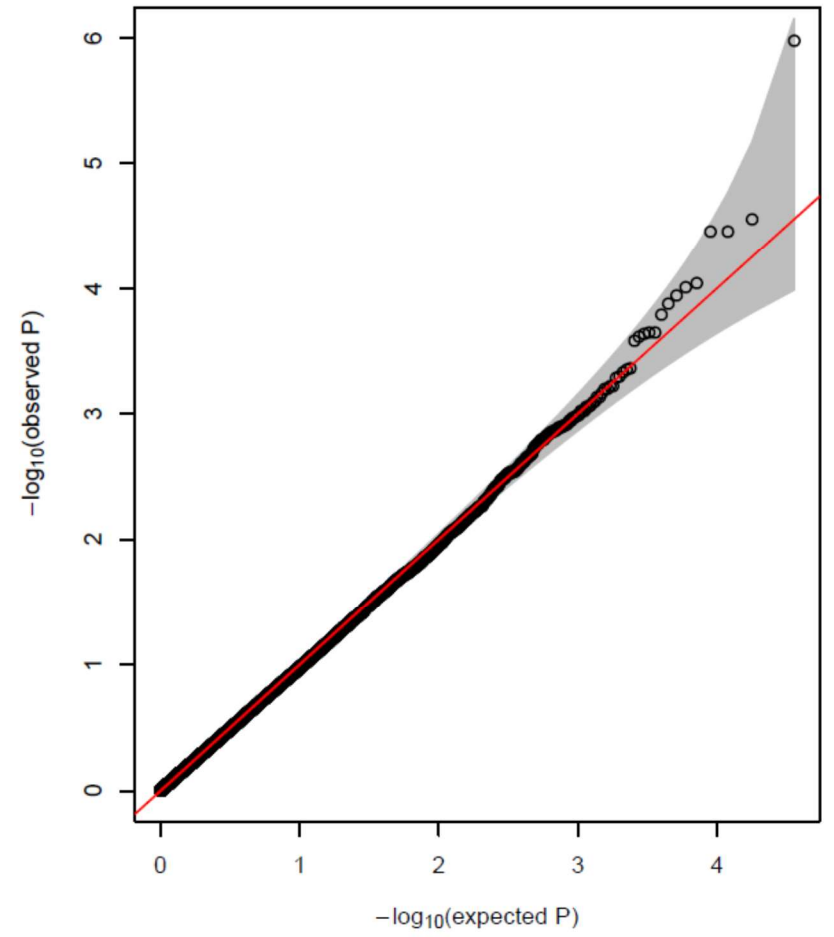

# DRP

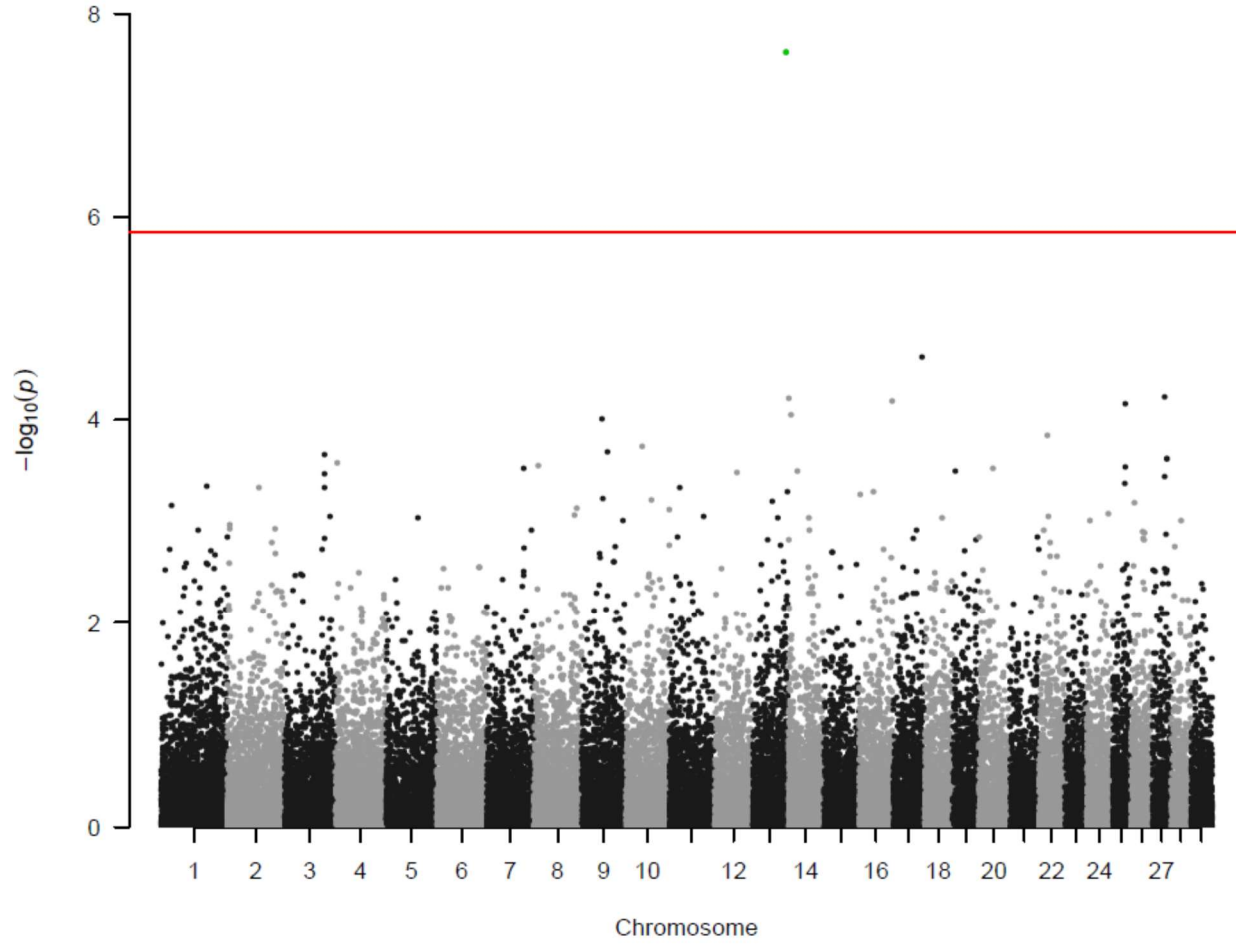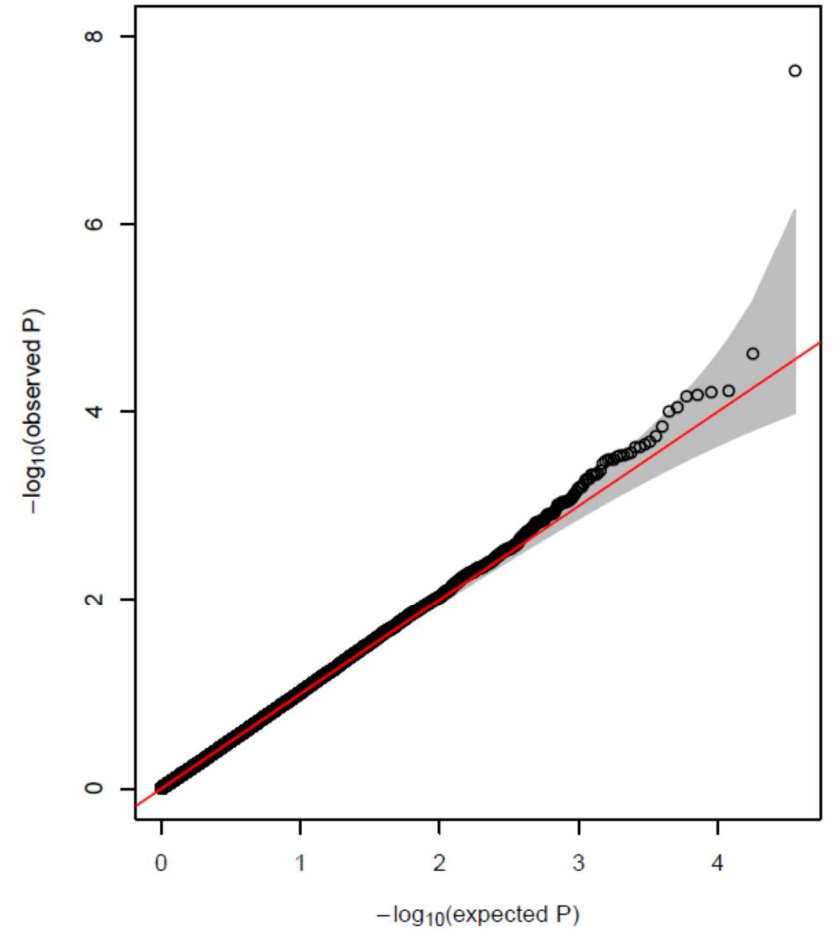

Supplement: pone.0221973.s001.pdf [file pone.0221973.s001.pdf]
